# Supplementary material
Source: publisher figshare collection journal article supplement (https://tandf.figshare.com/ndownloader/files/18018590)
Supplement: Supplementary file 1 [file 18018590]

## SUPPLEMENTARY MATERIAL

### Structure elucidation and NMR assignments of a new sesquiterpene of volatile oil from *Artemisia frigida* Willd

Saranchimeg Borchuluun, Qinghu Wang \*, Yanhua Xu, Xiang He, Wenqiang Bao, Biligetu Pa

*College of Traditional Mongolian Medicine, Inner Mongolia University for Nationalities, Tongliao 028000, Inner Mongolia, China*

A new sesquiterpene, artefrigin (**5**), together with four known sesquiterpenes were isolated from the volatile oil of *Artemisia frigida* Willd. The structure of **5** was elucidated by spectroscopic methods, including UV, IR, HR-ESI-MS and extensive 1D and 2D NMR techniques.

Keywords: *Artemisia frigida* Willd.; Compositae; Sesquiterpene; Artefrigin

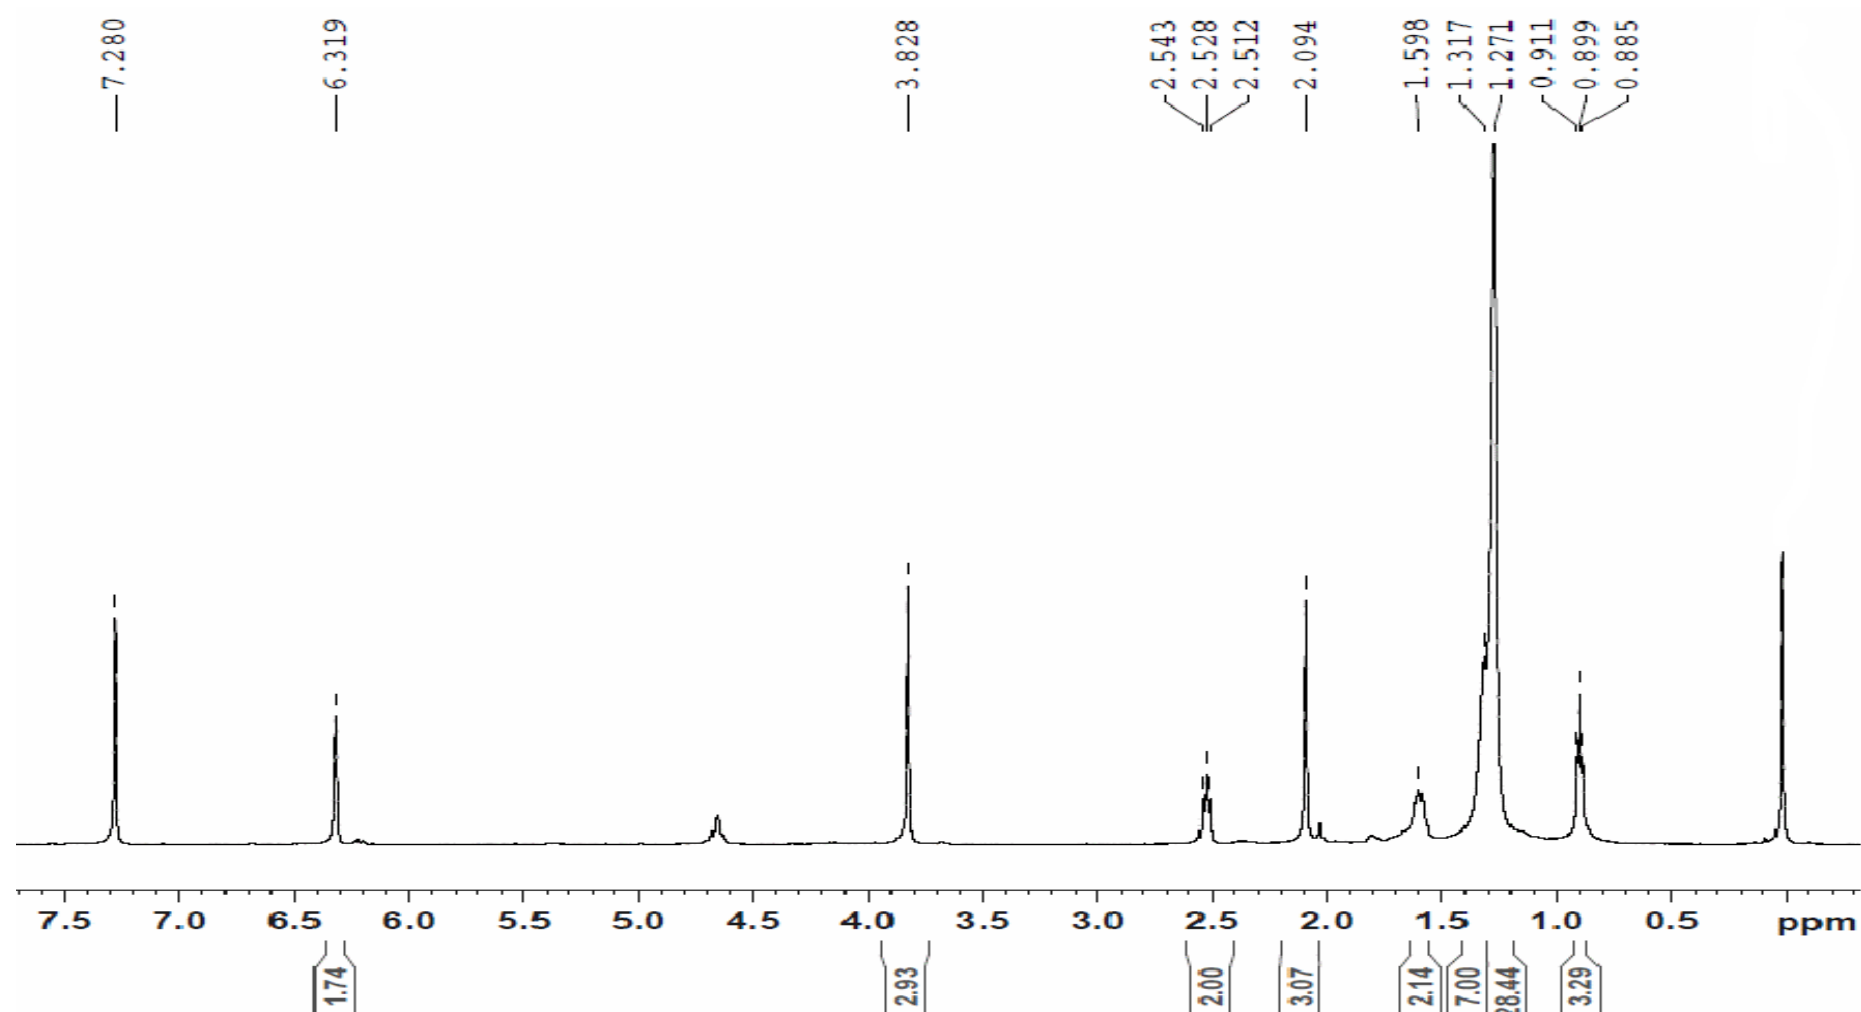

Figure S1.  $^1\text{H}$ -NMR spectrum of compound 5

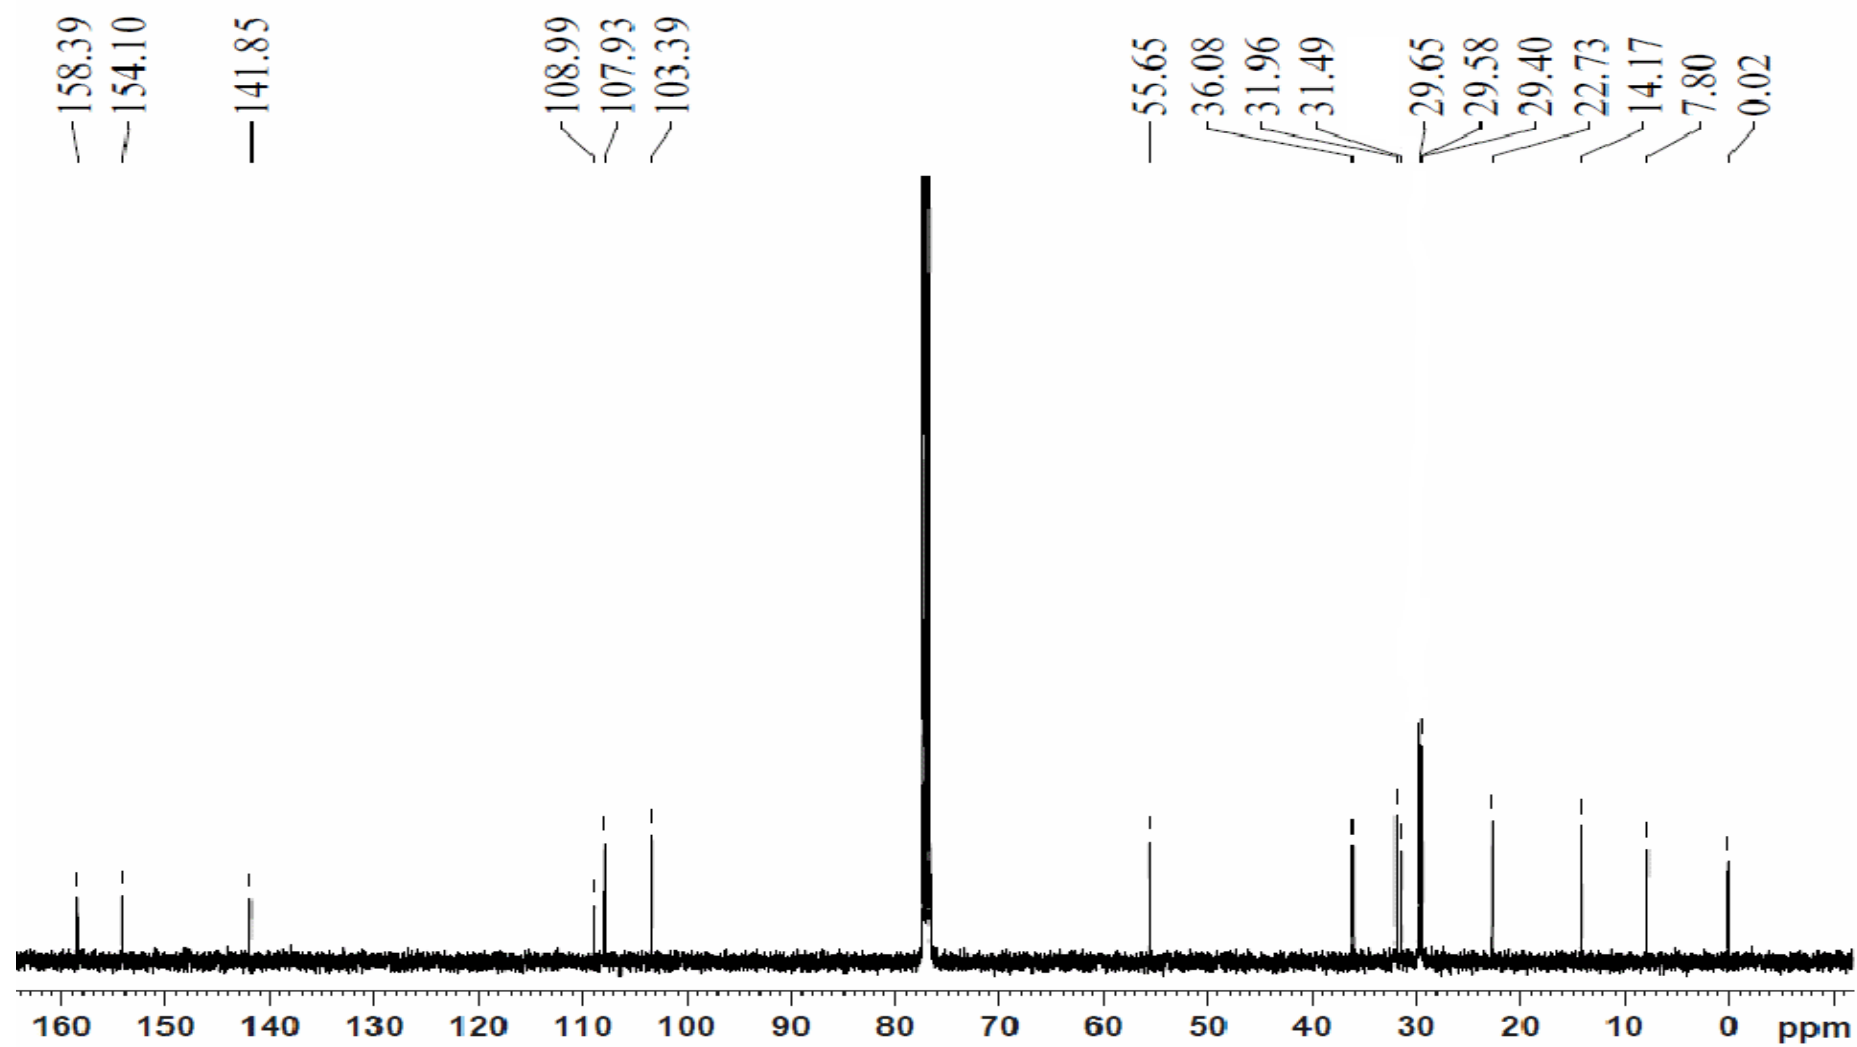

Figure S2. <sup>13</sup>C-NMR spectrum of compound 5

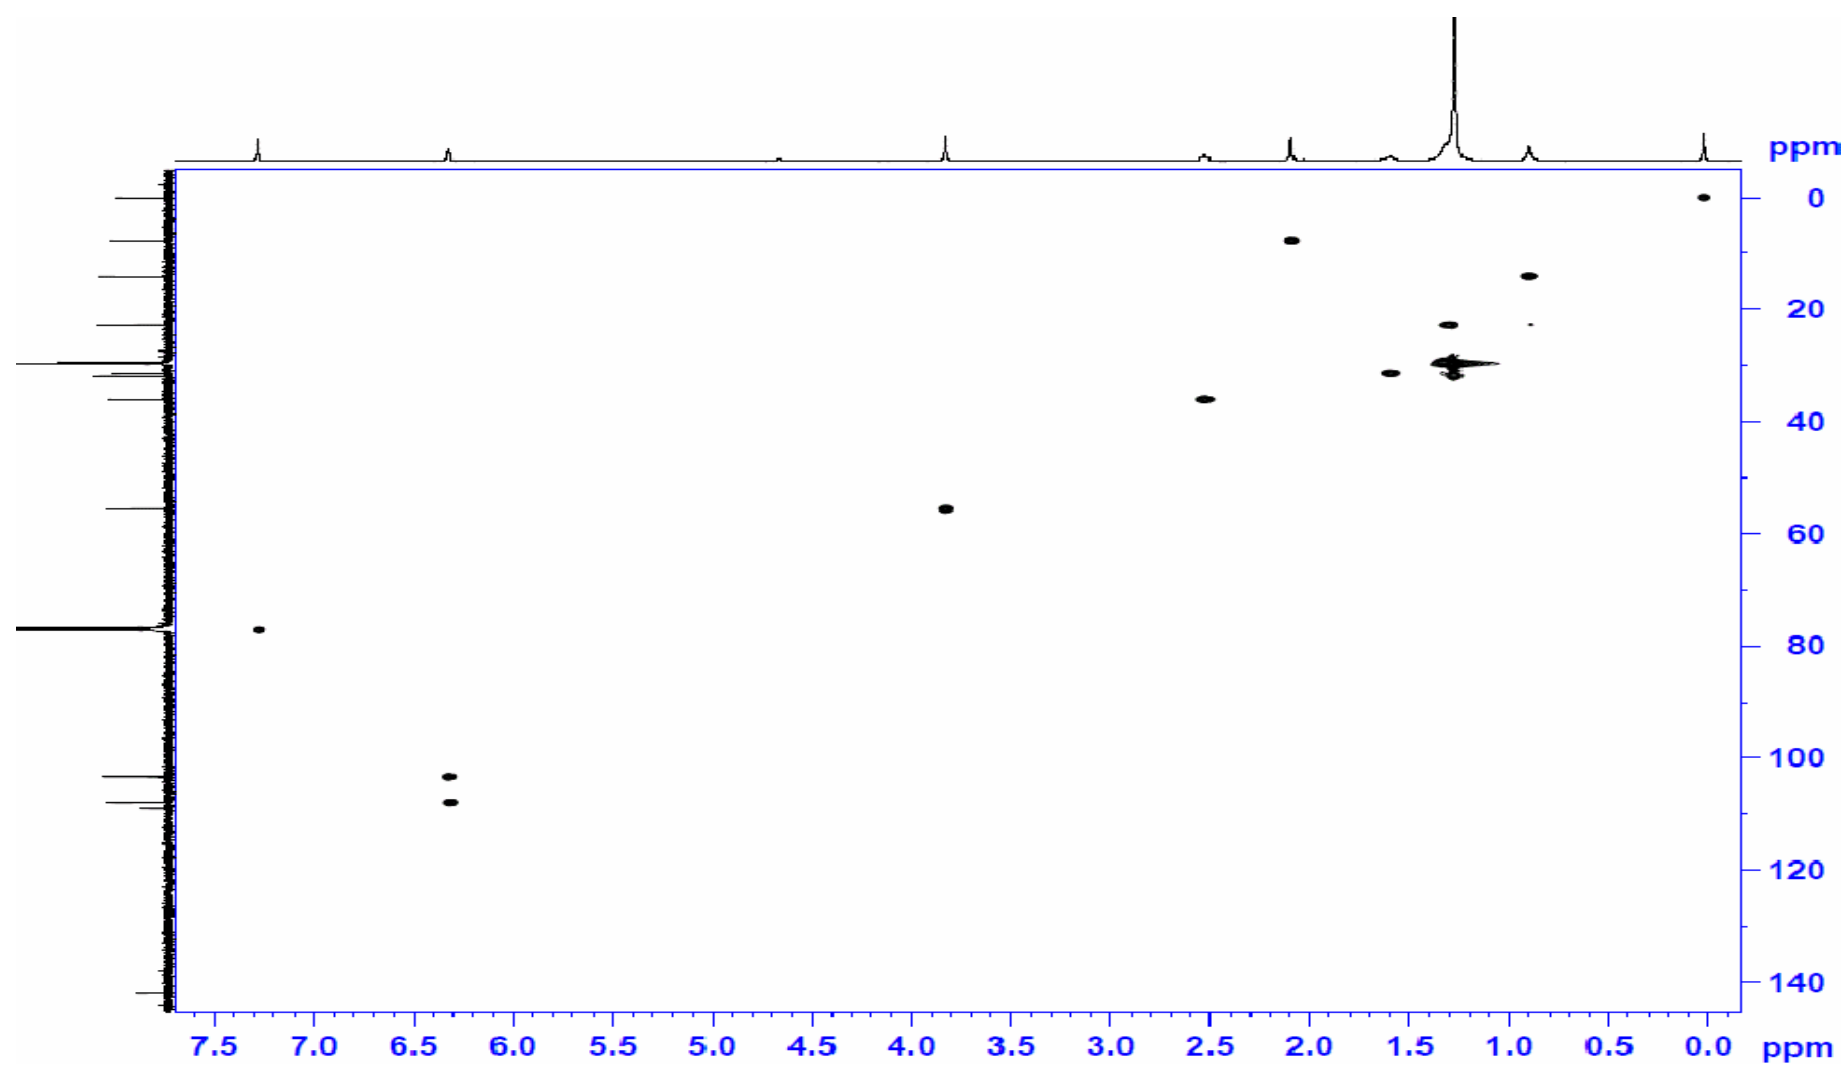

Figure S3. HSQC spectrum of compound 5

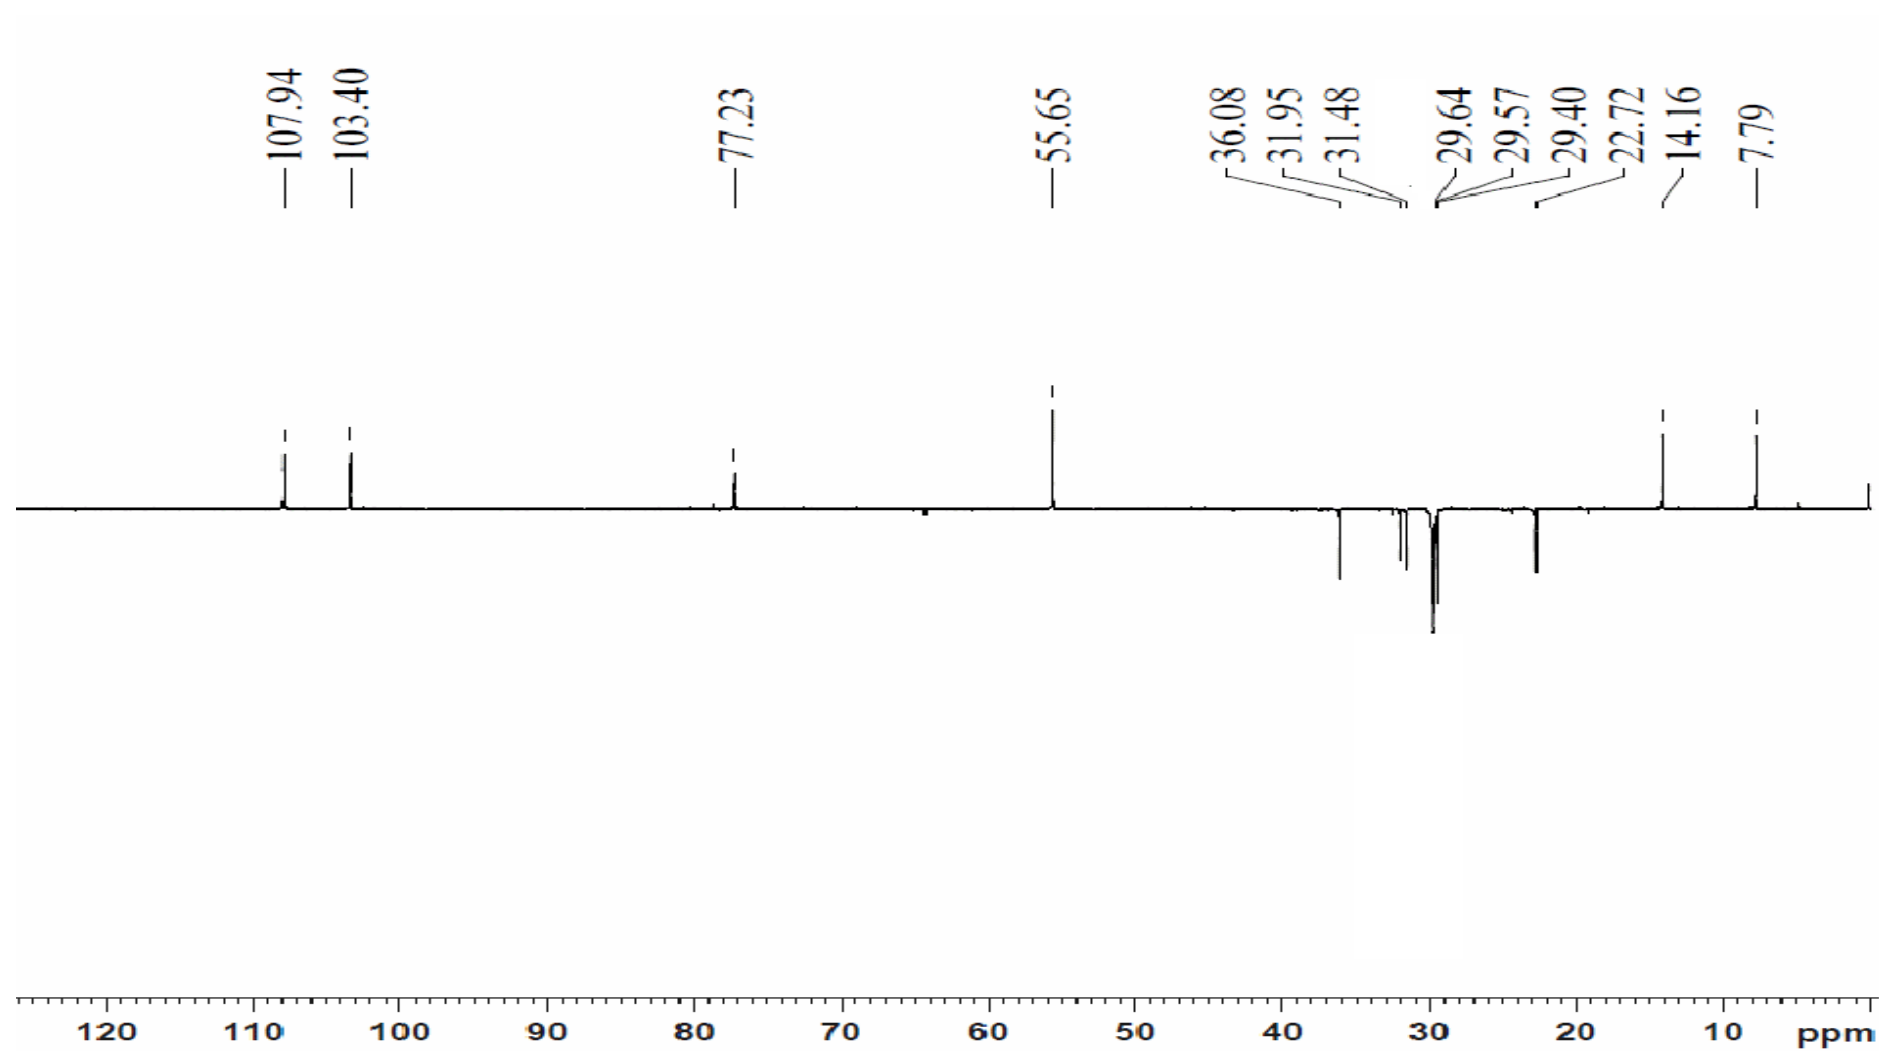

Figure S4. DEPT spectrum of compound 5

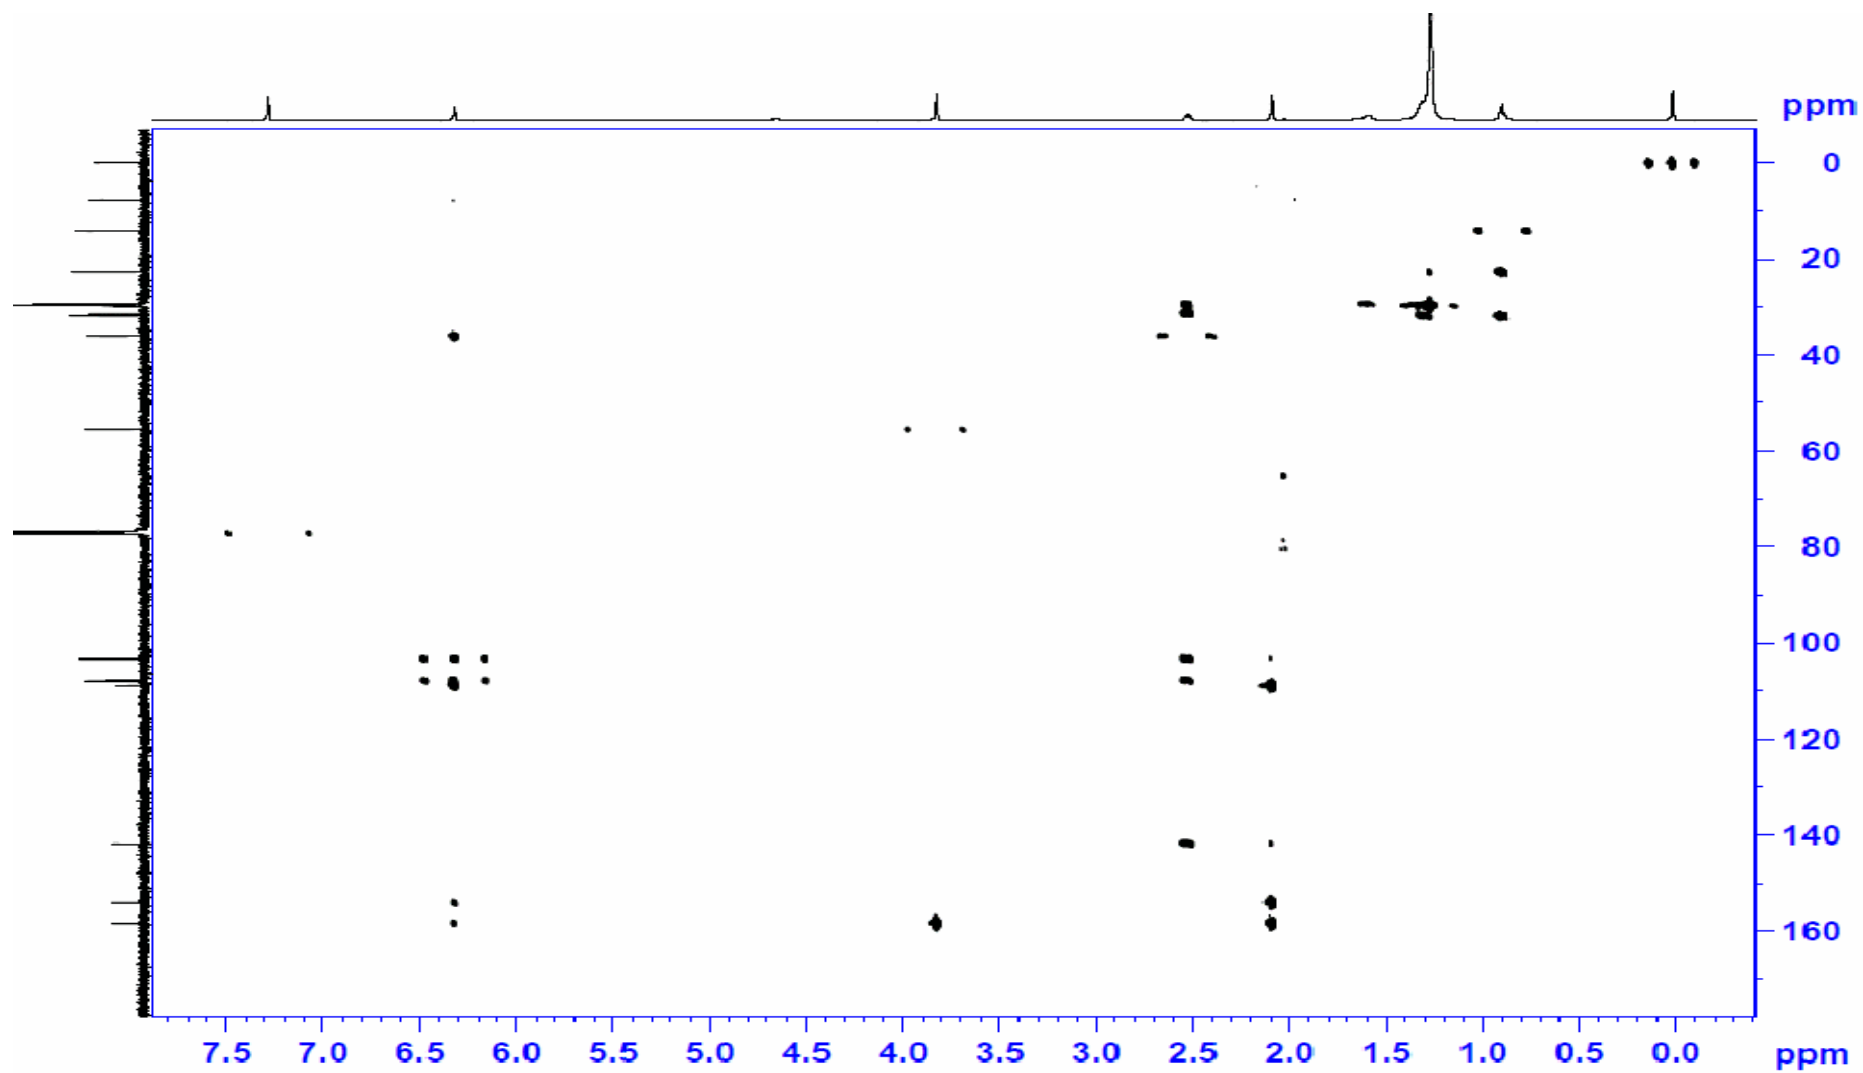

Figure S5 HMBC spectrum of compound **5**

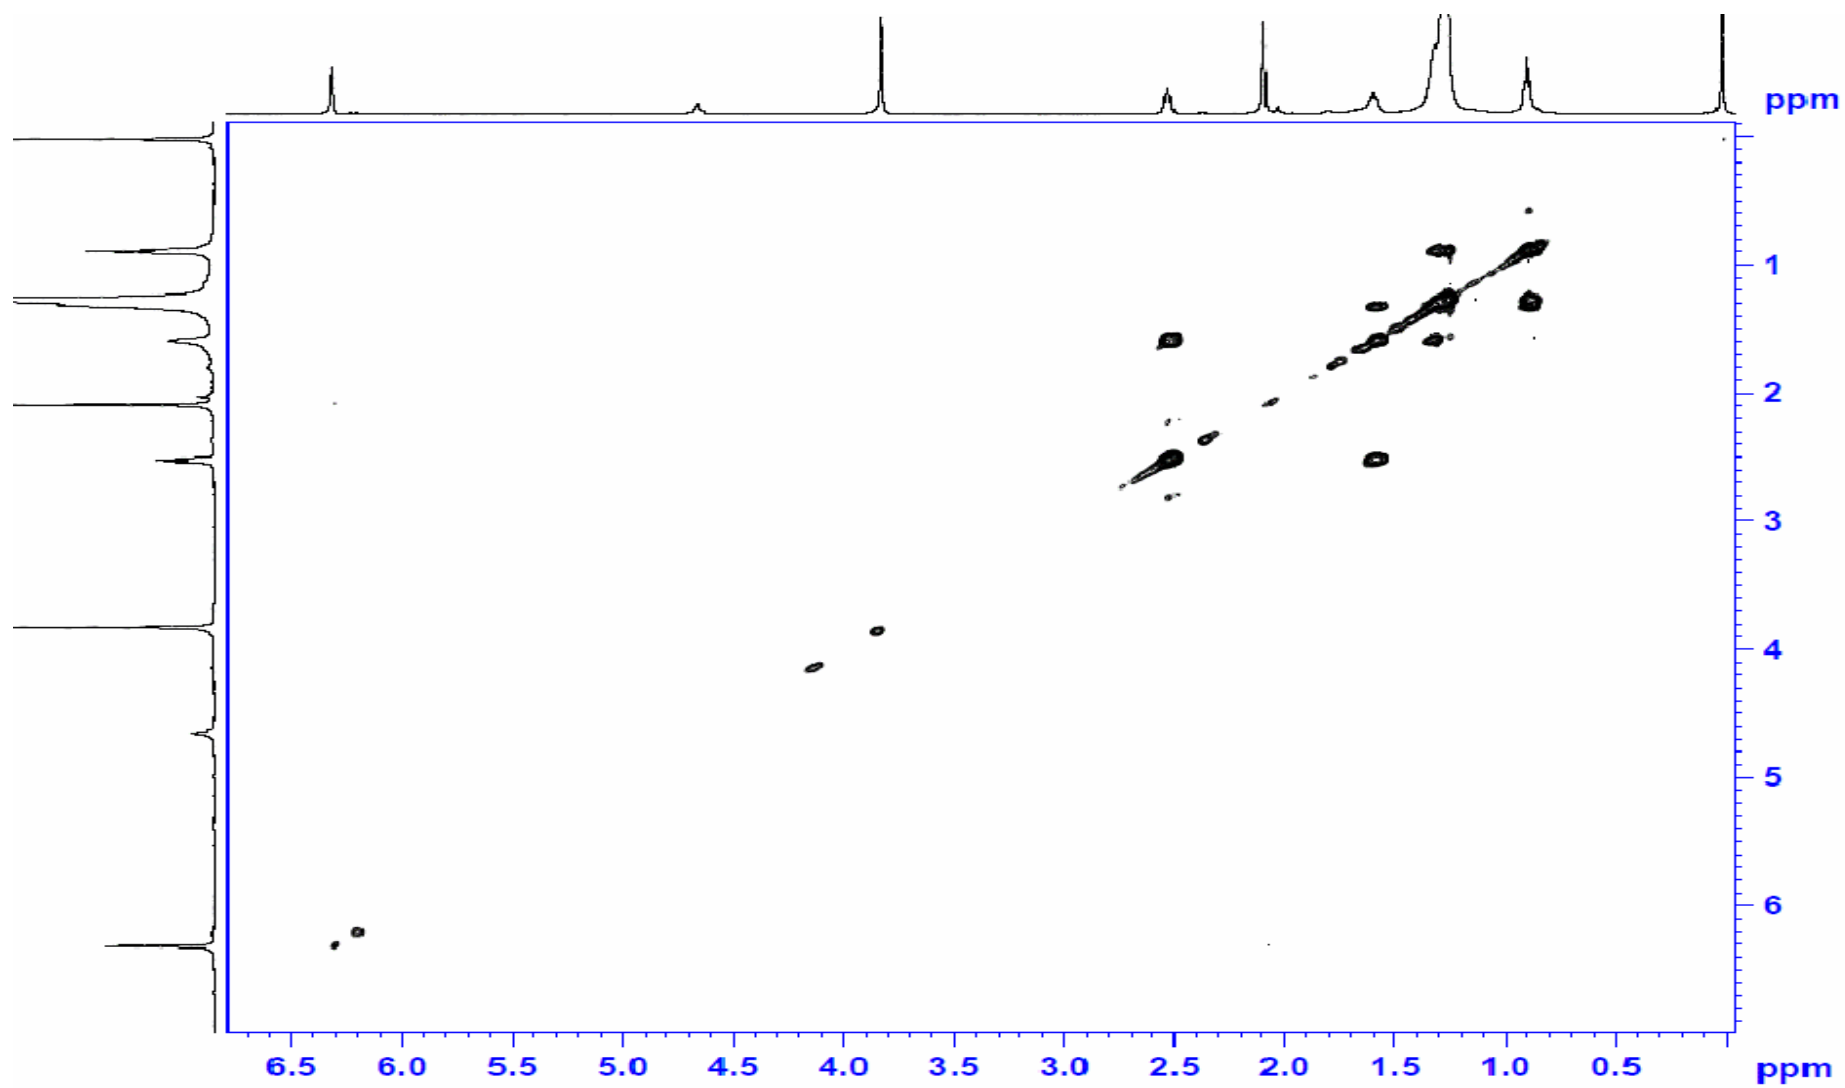

Figure S6. COSY spectrum of compound **5**

### Single Mass Analysis

Tolerance = 500.0 mDa / DBE: min = -1.5, max = 50.0

Element prediction: Off

Monoisotopic Mass, Even Electron Ions

1 formula(e) evaluated with 1 results within limits (up to 50 closest results for each mass)

Elements Used:

C: 16-16 H: 25-25 O: 0-2 <sup>23</sup>Na: 0-1

| Mass     | Calc. Mass | mDa   | PPM   | DBE | Formula                                        | C  | H  | O | <sup>23</sup> Na |
|----------|------------|-------|-------|-----|------------------------------------------------|----|----|---|------------------|
| 249.1845 | 249.1855   | -12.0 | -11.5 | 4.5 | C <sub>16</sub> H <sub>25</sub> O <sub>2</sub> | 16 | 25 | 2 |                  |

20190719-2 25 (0.545)

1: TOF MS ES-

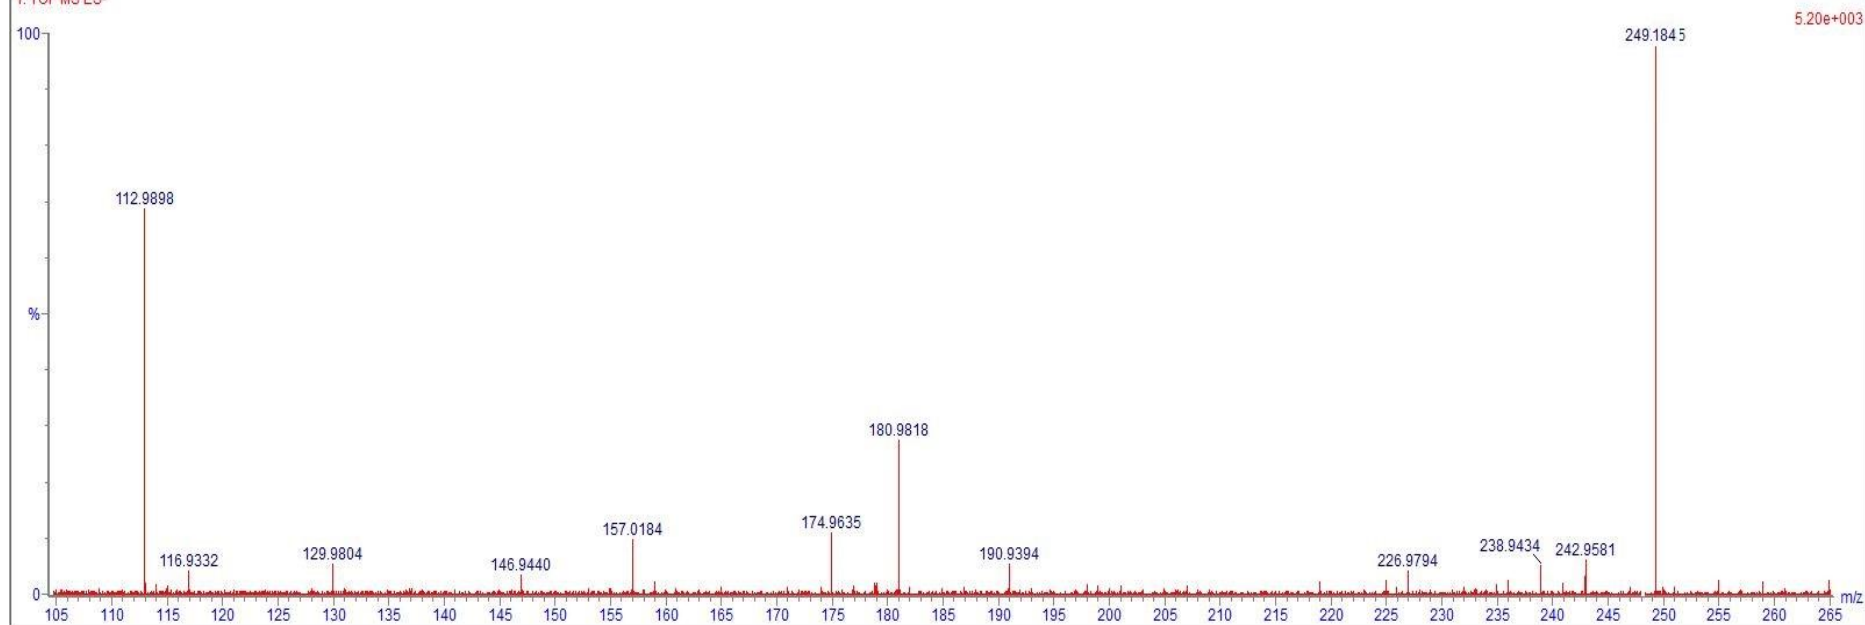

Figure S7. MS spectrum of compound **5**



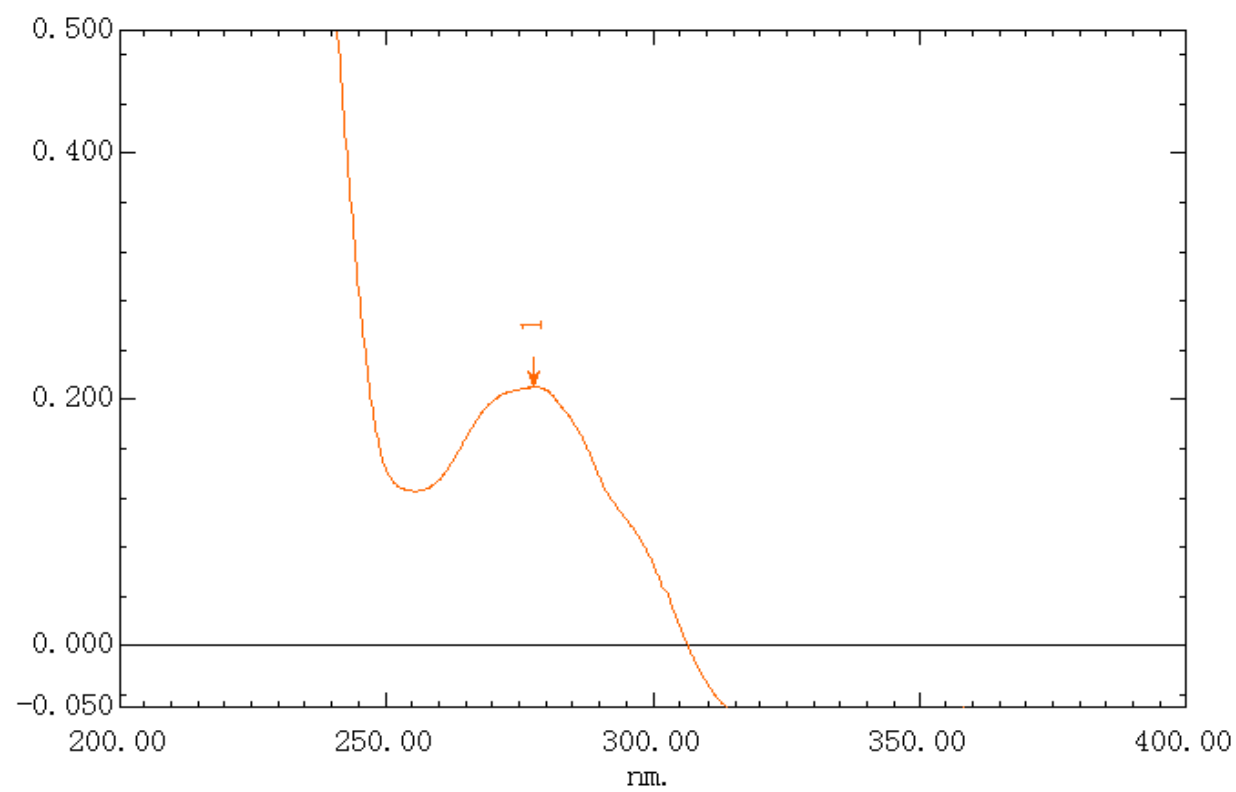

Figure S8. UV spectrum of compound **5**

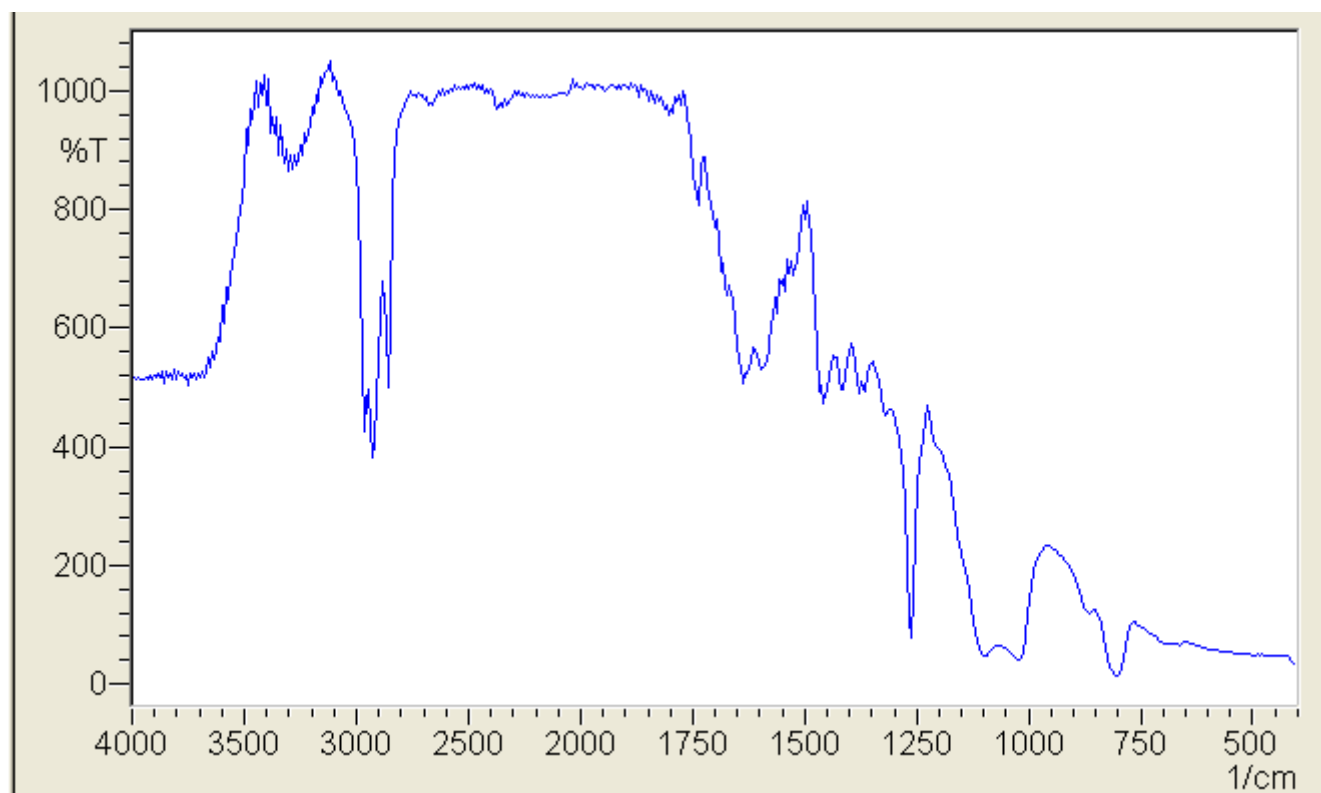

Figure S9. IR spectrum of compound **5**

**Table S1.**  $^1\text{H}$  and  $^{13}\text{C}$ -NMR data (500 and 125 MHz, resp.;  $\text{CDCl}_3$ ) of compound **5**.

| Position           | $\delta_{\text{H}}$ (ppm), $J$ (Hz) | $\delta_{\text{C}}$ (ppm) | HMBC                    |
|--------------------|-------------------------------------|---------------------------|-------------------------|
| 1                  | —                                   | 141.9                     |                         |
| 2                  | 6.32 (1H, brs)                      | 103.4                     | C-3, C-4, C-6, C-7      |
| 3                  | —                                   | 158.4                     |                         |
| 4                  | —                                   | 109.0                     |                         |
| 5                  | —                                   | 154.1                     |                         |
| 6                  | 6.32 (1H, brs)                      | 108.0                     | C-2, C-4, C-5, C-7      |
| 7                  | 2.52 (2H, t, $J = 7.05\text{Hz}$ )  | 36.1                      | C-1, C-2, C-6, C-8, C-9 |
| 8                  | 1.60 (2H, m)                        | 31.5                      |                         |
| 9                  | 1.31-1.33 (2H, m)                   | 29.7                      |                         |
| 10                 | 1.31-1.33 (2H, m)                   | 29.4                      |                         |
| 11                 | 1.31-1.33 (2H, m)                   | 29.6                      |                         |
| 12                 | 1.18 (2H, m)                        | 32.0                      |                         |
| 13                 | 1.31-1.33 (2H, m)                   | 22.7                      |                         |
| 14                 | 0.90 (3H, t, $J = 6.5\text{ Hz}$ )  | 14.2                      | C-12, C-13              |
| 15                 | 2.09 (3H, s)                        | 7.80                      | C-3, C-4, C-5           |
| 3-OCH <sub>3</sub> | 3.82 (3H, s)                        | 55.7                      | C-3                     |
